# Supplementary material for: Crystal structures of dimeric and heptameric mtHsp60 reveal the mechanism of chaperonin inactivation
Source: Life Sci Alliance. 2023 Mar 27;6(6):e202201753. doi: 10.26508/lsa.202201753 (PMC10053435; doi:10.26508/lsa.202201753)
Supplement: Supplementary file 2 [file LSA-2022-01753_TableS2.xlsx]

## Sheet: Table S1
Table S2. X-ray data collection and refinement statistics.
	naïve EcHsp607	naïve EcHsp602
Dataset
PDB accession #	7V9R	7V98
X-ray source	Beamline 13B1, NSRRC	Beamline 13B1, NSRRC
Temperature (K)	100	100
Space group	P 21 21 21	P 21 21 21
Cell parameters	140.1, 141.0, 240.3	89.3, 95.4, 128.0
a, b, c (Å)
Wavelength (Å)	1	1
Data processing
Resolution (Å)	30.0 - 3.5 (3.63 - 3.5)	30 - 2.35 (2.43 - 2.35)
R-merge (%)a	5.92 (46.1)	6.10 (80.4)
CC1/2	0.998 (0.799)	0.998 (0.722)
Mean I/sigma(I)	14.09 (3.11)	13.69 (2.62)
Completeness (%)	85.47 (71.64)	91.47 (86.30)
Measured reflections	219,433 (13,512)	238,494 (17,668)
Unique reflections	51,897 (4,277)	42,352 (3,936)
Redundancy	4.2 (3.2)	5.6 (4.5)
Refinement statistics
Data range (Å)	30.0 - 3.5	30 - 2.35
Reflections	51876 (4276)	42303 (3932)
R-work (%)b	18.41 (26.08)	20.68 (25.59)
R-free (%)c	22.99 (32.98)	26.25 (31.18)
R.M.S. △bonds (Å)d	0.002	0.004
R.M.S. △angles (°)d	0.46	0.58
Non-hydrogen atoms	26003	5815
Macromolecules	26003	5715
ligands	0	16
solvent	0	84
Ramachandran plot, residues in
favoured (%)	97.89	97.91
allowed (%)	2.11	2.09
outliers (%)	0	0
Rotamer outliers (%)	0	1.16
Average B-factor	117.42	67.89
Highest resolution shell is shown in parenthesis.
aRmerge = 100 × ∑h∑i | Ii(h) − <I(h)> |/∑h<I(h)>, where Ii(h) is the ith measurement and <I(h)> is the weighted mean of all measurements of I(h) for Miller indices h.
bR-factor = 100 × ∑|FP – FP(calc)|/∑ FP.
cRfree was calculated with 5% of the data.
dRoot-mean-squared deviation (r.m.s. ∆) from target geometries.
