# Supplementary material for: Crystal structures of dimeric and heptameric mtHsp60 reveal the mechanism of chaperonin inactivation
Source: Life Sci Alliance. 2023 Mar 27;6(6):e202201753. doi: 10.26508/lsa.202201753 (PMC10053435; doi:10.26508/lsa.202201753)
Supplement: Supplementary file 3 [file LSA-2022-01753_TableS3.xlsx]

## Sheet: Table S2
Table S3. PISA analysis results of naïve EcHsp602 and EcHsp607
ID	PDB code	Multimeric state	Surface area (Å2)	Buried area (Å2)	Interface area (Å2)	ΔGint (kcal/mol)	ΔGdiss (kcal/mol)	TΔSdiss (kcal/mol)	CSS
naïve EcHsp602	7V98	2	37011.8	3943.8	1971.9	-32.8	22.9	14.5	1
naïve EcHsp607	7V9R	7	152793	17862.7	1275.9*	-95.4	52	93.1	1
*Average interfacial area: average of the subunits of the heptamer
CSS: Complexation Significance Score (0-1)
