# Supplementary material for: Crystal structures of dimeric and heptameric mtHsp60 reveal the mechanism of chaperonin inactivation
Source: Life Sci Alliance. 2023 Mar 27;6(6):e202201753. doi: 10.26508/lsa.202201753 (PMC10053435; doi:10.26508/lsa.202201753)
Supplement: Supplementary file 5 [file LSA-2022-01753_TableS5.xlsx]

## Sheet: Table S4
Table S5. Interacting residues between subunits in naïve EcHsp602
##	Domain	Chain A	Dist. [Å]	Chain B	Atoms
1	E	A90	3.89	A532	O-CB
2	E	V92	3.68	P475	CG1-CA
3	E	V92	3.83	P475	CG1-CB
4	E	V92	4	P475	CG1-N
5	E	L93	3.67	L444	CD1-CD1
6	E	L93	3.89	A471	CD2-O
7	E	L93	3.91	P475	CD2-CG
8	E	L93	3.82	A528	CD1-O
9	E	L93	3.77	L529	CD1-CA
10	E	L93	3.96	L529	CD1-CD1
11	E	L93	3.99	L529	CD1-N
12	E	L93	3.81	A532	C-CB
13	E	L93	3.68	A532	CB-CB
14	E	A94	3.48	A532	N-CB
15	E	A94	3.67	A532	CA-CB
16	E	A94	3.95	A532	CB-CB
17	E	A96	3.99	A471	CB-O
18	E	A96	3.91	A471	CB-CB
19	E	A96	3.81	A471	C-CB
20	E	A96	3.78	A471	O-CB
21	E	A96	3.75	I474	CB-CG2
22	E	A96	3.62	I474	CB-CB
23	E	A96	3.7	I474	CB-CG1
24	E	I97	3.8	I467	O-CG2
25	E	I97	3.69	I468	CD1-CD1
26	E	I97	3.89	A471	N-CB
27	E	I97	3.88	A471	CG1-CB
28	E	I97	3.93	A532	CD1-O
29	E	E100	3.82	R470	OE1-CA
30	E	E100	3.43	R470	OE1-C
31	E	E100	2.96	R470	OE1-O
32	E	E100	3.25	R470	OE1-CB
33	E	E100	3.82	R470	OE2-NE
34	E	E100	3.93	R470	CD-O
35	E	E100	3.58	R470	CD-CB
36	E	E100	3.92	R470	CB-CB
37	E	E100	3.72	I474	OE1-CD1
38	E	G101	3.61	I467	CA-CG1
39	E	G101	3.75	I467	CA-CG2
40	E	G101	3.8	I467	CA-CD1
41	E	F102	3.97	I131	CE2-CD1
42	E	D103	3.88	R470	CB-NH2
43	E	D103	3.72	R470	OD1-CZ
44	E	D103	2.47	R470	OD1-NH2
45	E	D103	3.1	R470	CG-NH2
46	E	D103	3.72	R470	OD2-NH2
47	E	T104	3.99	I463	CG2-O
48	E	T104	3.99	I463	CG2-CG2
49	E	T104	3.91	E466	CG2-CB
50	E	T104	3.95	E466	CG2-CG
51	E	T104	3.83	I467	CB-CG1
52	E	T104	3.88	I467	OG1-CG1
53	E	T104	3.6	R470	OG1-CD
54	E	T104	3.52	R470	OG1-NE
55	E	T104	3.54	R470	OG1-CZ
56	E	T104	3.58	R470	OG1-NH1
57	E	I105	3.77	S132	O-CA
58	E	I105	3.97	S132	CG2-CA
59	E	I105	3.6	S132	CG2-CB
60	E	I105	3.85	I140	CG1-CD1
61	E	I105	3.72	I463	CG1-CG2
62	E	I105	3.94	I467	CD1-CD1
63	E	S106	3.57	I131	CB-CG2
64	E	S106	3.98	I131	CA-CG2
65	E	S106	3.82	I131	CA-O
66	A	Y201	3.67	A232	CE2-CB
67	A	Y201	3.48	Q235	OH-CG
68	A	I203	3.79	L291	O-CD2
69	A	N204	3.33	L291	CB-O
70	A	N204	3.77	L291	CA-O
71	A	N204	3.85	L291	CA-CB
72	A	N204	3.72	L291	C-CB
73	A	N204	3.77	L291	O-C
74	A	N204	3.47	L291	O-CB
75	A	N204	3.96	K292	ND2-CD
76	A	N204	3.57	K292	ND2-NZ
77	A	N204	3.85	K292	O-CA
78	A	N204	3.95	K292	O-CD
79	A	N204	3.78	K292	O-N
80	A	A206	3.8	Y227	CB-CE2
81	A	A206	3.67	L291	N-CD1
82	A	A206	3.93	L291	CB-CD1
83	A	Q209	3.83	Y227	CG-OH
84	A	E212	3.85	K292	C-NZ
85	A	E212	2.95	K292	O-NZ
86	A	R264	3.9	L291	CZ-O
87	A	R264	2.9	L291	NH2-O
88	A	R264	3.85	L291	NH2-CA
89	A	R264	3.75	L291	NH2-C
90	A	L265	3.76	I229	CD2-O
91	A	L265	3.77	N230	C-O
92	A	L265	3.73	N230	O-CA
93	A	L265	3.97	N230	O-O
94	A	L265	3.82	N230	CB-CA
95	A	L265	3.67	N230	CB-C
96	A	L265	3.32	N230	CB-O
97	A	L265	4	N230	C-CB
98	A	L265	3.28	N230	O-CB
99	A	L265	3.75	A232	CD1-N
100	A	L265	3.89	R290	CA-NH2
101	A	L265	3.73	R290	C-NH2
102	A	L265	3.84	R290	O-CZ
103	A	L265	2.83	R290	O-NH2
104	A	L265	3.97	R290	O-NH1
105	A	K266	3.88	N230	N-O
106	A	K266	3.69	N230	CE-ND2
107	A	K266	3.98	N230	NZ-ND2
108	A	K266	3.73	E238	CE-O
109	A	K266	3.02	E238	NZ-O
110	A	K266	3.91	E238	NZ-C
111	E	L418	3.95	T115	CD1-CG2
112	E	L418	3.73	L119	CD2-CD2
113	E	L418	3.83	L119	CD1-CD2
114	E	I437	3.74	T130	CD1-CG2
115	E	I437	3.65	T130	CD1-O
116	E	I437	4	T130	O-CG2
117	E	I437	4	I131	CG2-CG1
118	E	I441	4	G127	CG2-N
119	E	I441	3.69	G127	CG2-CA
120	E	I441	3.78	T130	CG1-CB
121	E	I441	4	T130	CG1-CG2
122	E	I441	3.96	I131	CD1-CD1
123	E	R444	3.95	E126	CB-CB
124	E	R444	3.99	E126	CB-CD
125	E	R444	3.33	E126	CB-OE2
126	E	R444	3.81	E126	CG-OE2
127	E	R444	3.92	E126	CD-CD
128	E	R444	3.27	E126	CD-OE2
129	E	R444	3.77	D129	NH1-CB
130	E	R444	3.41	T130	NE-OG1
131	E	R444	3.88	T130	NH2-CA
132	E	R444	3.58	T130	NH2-OG1
133	E	R444	3.44	T130	CZ-OG1
134	E	A445	3.46	L119	O-CD1
135	E	A445	3.95	A122	CA-CB
136	E	A445	3.81	A122	CB-C
137	E	A445	3.64	A122	CB-CB
138	E	A445	4	A122	O-CB
139	E	A445	3.63	I123	CB-CG1
140	E	A445	3.97	I123	CB-CA
141	E	A445	3.68	I123	CB-N
142	E	I448	3.67	A122	CD1-CB
143	E	P449	3.96	L119	CG-CD1
144	E	M487	3.83	T114	CE-CB
145	E	M487	3.75	T114	SD-CG2
146	E	M487	3.7	T114	CE-CG2
147	E	D494	3.81	T114	OD2-N
148	E	D494	3.5	T115	OD2-N
149	E	D494	3.46	T115	CG-CB
150	E	D494	3.15	T115	CG-OG1
151	E	D494	3.27	T115	OD1-CB
152	E	D494	2.47	T115	OD1-OG1
153	E	D494	3.29	T115	OD2-CB
154	E	D494	3.39	T115	OD2-OG1
155	E	D494	3.94	T115	OD2-CA
156	E	V498	3.8	A116	O-CB
157	E	V498	3.78	A116	CG1-CB
158	E	A502	3.57	A116	CB-CB
159	E	A506	3.66	I123	CB-CD1
160	E	A506	3.81	I123	CB-CG2
E: Equatorial domain; A: Apical domain.
Interface contacts is cacluted by using Protein Contacts Atlas
